# Supplementary material for: Effects of high-risk human papillomavirus infection on P53, pRb, and survivin in lung adenocarcinoma—a retrospective study
Source: PeerJ. 2023 Jul 26;11:e15570. doi: 10.7717/peerj.15570 (PMC10386818; doi:10.7717/peerj.15570)
Supplement: Supplemental Information 1 [file peerj-11-15570-s001.xlsx]

## Sheet: data
	HPV test results		Immunohistochemistry of cancer tissue						T	N	M	stage	lymphaden	smoke	gender	age
				carcinoma tissue		para-carcinoma tissue
number	carcinoma tissue	para-carcinoma tissue	RB	p53	survrvin	RB	p53	survrvin
1	negative	negative	+	-	+	+	-	-	T1	N0	M0	1	0/16	yes	man	53
2	negative	negative	+	-	-	+	-	-	T1	N0	M0	1	0/8	yes	man	71
3	HPV16 positive	negative	+	—	+	-	-	+	T1	N0	M0	1	0/10	yes	man	67
4	negative	negative	+	+	+	+	-	-	T1	N0	M0	1	0/9	no	woman	70
5	negative	negative	+	+	-	+	-	-	T1	N0	M0	1	0/8	no	woman	57
6	HPV18 positive	negative	+	+	+	-	-	-	T1	N0	M0	1	0/9	no	woman	65
7	negative	negative	-	-	+	+	-	-	T1	N0	M0	1	0/10	no	man	61
8	HPV18 positive	negative	-	—	-	+	-	-	T1	N0	M0	1	0/2	no	woman	81
9	negative	negative	-	—	+	+	-	-	T1	N0	M0	1	0/14	yes	man	51
10	negative	negative	-	-	-	+	-	-	T1	N2	M0	3	2/11	no	woman	60
11	negative	negative	-	-	+	+	-	-	T1	N0	M0	1	0/17	no	man	73
12	HPV16 HPV18 HPV82 positive	negative	+	+	+	+	-	-	T1	N3	M0	3	4/17	yes	man	67
13	negative	negative	+	-	-	+	-	-	T2	N0	M0	1	0/14	no	woman	51
14	HPV18 positive	negative	-	—	+	+	-	-	T1	N0	M0	1	0/13	yes	man	53
15	negative	negative	-	—	+	+	-	-	T1	N0	M0	1	0/11	yes	man	67
16	HPV18 positive	negative	+	—	+	+	-	-	T3	N0	M0	2	0/17	no	woman	61
17	negative	negative	-	—	+	+	-	-	T1	N0	M0	1	0/12	no	woman	68
18	negative	negative	-	-	+	+	-	-	T2	N2	M0	3	2/13	no	woman	75
19	negative	HPV53 positive	-	—	-	+	+	+	T1	N0	M0	1	0/6	no	woman	68
20	negative	HPV82 positive	+	—	-	+	-	+	T1	N0	M0	1	0/1	no	man	65
21	negative	negative	+	-	-	+	-	-	T1	N0	M0	1	1/7	no	woman	76
22	HPV18 positive	HPV18 positive	-	+	+	-	-	+	T1	N0	M0	1	0/21	no	woman	61
23	negative	HPV33 positive	-	—	-	+	-	+	T1	N0	M0	1	0/15	yes	man	45
24	negative	negative	+	—	-	+	-	-	T1	N0	M0	1	0/5	no	man	60
25	negative	negative	-	+	+	+	-	-	T1	N0	M0	1	0/13	no	woman	73
26	negative	negative	-	+	-	+	-	-	T1	N0	M0	1	0/9	no	woman	46
27	HPV16 positive	negative	+	+	+	+	-	-	T2	N0	M0	2	0/11	no	woman	73
28	negative	negative	+	-	+	+	-	-	T3	N0	M0	2	0/20	yes	man	66
29	negative	negative	+	+	+	+	-	-	T1	N0	M0	1	0/15	no	woman	51
30	negative	negative	+	-	-	+	-	-	T1	N0	M0	1	0/6	no	woman	61
31	negative	negative	+	-	-	+	-	-	T1	N0	M0	1	0/24	no	woman	67
32	negative	negative	+	-	+	+	-	-	T1	N0	M0	1	0	yes	man	74
33	HPV16、18 positive	negative	-	-	+	+	-	-	T1	N0	M0	1	0/10	no	man	63
34	negative	negative	-	-	-	-	-	-	T1	N0	M0	1	0/7	no	woman	68
35	HPV16 positive	negative	-	-	+	+	-	-	T1	N0	M0	1	0/7	yes	woman	57
36	HPV16 positive	negative	-	+	+	+	-	-	T1	N0	M0	1	0/19	no	woman	72
37	negative	negative	+	-	-	+	-	-	T1	N0	M0	1	0/13	no	woman	64
38	negative	negative	+	+	+	+	-	-	T2	N0	M0	2	0/7	no	man	68
39	negative	negative	+	+	-	+	-	-	T2	N0	M0	2	0/6	no	man	79
40	negative	HPV52 positive	+	-	-	+	+	+	T2	N0	M0	2	0/17	no	woman	64
41	HPV16 positive	negative	+	+	+	+	-	-	T1	N1	M0	2	1/4	no	woman	54
42	HPV18 positive	negative	-	-	-	+	-	-	T1	N0	M0	1	0/6	no	woman	59
43	negative	negative	+	-	-	+	-	-	T1	N0	M0	1	0	yes	man	59
44	HPV16 positive	negative	-	+	+	+	-	-	T1	N0	M0	1	0/6	no	woman	61
45	negative	negative	+	-	-	+	-	-	T1	N0	M0	1	0	yes	man	63
46	negative	negative	+	-	+	+	-	-	T1	N0	M0	1	0/5	no	woman	55
47	negative	negative	+	-	-	+	-	-	T1	N0	M0	1	0/10	no	woman	60
48	negative	HPV43 positive	-	-	-	+	-	+	T1	N0	M0	1	0/6	no	woman	65
49	negative	negative	+	+	+	+	-	+	T2	N0	M0	2	0/14	yes	man	70
50	negative	negative	-	-	-	+	-	-	T1	N0	M0	1	0/1	no	woman	70
51	negative	negative	+	-	-	+	-	-	T1	N0	M0	1	0/2	yes	man	62
52	negative	HPV82 positive	+	-	-	-	+	+	T1	N0	M0	1	0/14	no	woman	70
53	HPV52 positive	negative	-	+	+	+	-	-	T2	N0	M0	2	0/19	no	woman	61
54	negative	negative	-	+	-	+	-	-	T1	N0	M0	1	0/2	no	woman	69
55	negative	negative	+	-	+	+	-	-	T1	N0	M0	1	0/3	no	woman	50
56	negative	negative	+	-	-	+	-	-	T1	N0	M0	1	0/3	no	woman	74
57	negative	negative	-	-	+	+	-	-	T1	N0	M0	1	0/8	no	man	48
58	negative	negative	-	-	+	+	-	-	T1	N0	M0	1	0/1	no	woman	67
59	negative	negative	+	-	-	+	-	-	T1	N0	M0	1	0/5	no	woman	60
60	HPV16 positive	negative	-	-	+	+	-	-	T1	N0	M0	1	0/12	yes	man	69
61	negative	negative	+	-	-	+	-	-	T1	N0	M0	1	0	no	woman	53
62	negative	negative	+	-	-	+	-	-	T1	N0	M0	1	0	no	woman	53
63	HPV18 positive	negative	-	+	+	+	-	+	T2	N0	M0	2	0/1	no	woman	63
64	HPV16 positive	negative	-	+	+	+	-	-	T2	N0	M0	2	0/7	no	woman	55
65	HPV16 、56positive	negative	-	-	+	+	-	-	T1	N0	M0	1	0/5	yes	man	62
66	negative	negative	+	-	+	+	-	-	T1	N0	M0	1	0/12	no	woman	54
67	HPV16 positive	negative	-	-	+	+	-	-	T1	N0	M0	1	0/1	yes	man	63
68	negative	negative	+	-	-	+	-	-	T1	N0	M0	1	0/10	no	woman	73
69	HPV16 positive	negative	+	-	+	+	-	-	T1	N0	M0	1	0/9	no	woman	61
70	negative	negative	-	-	-	+	-	-	T1	N0	M0	1	0/3	no	woman	65
71	negative	negative	+	-	+	+	-	-	T1	N0	M0	1	0/11	yes	man	66
72	negative	negative	+	-	+	+	-	-	T1	N0	M0	1	0/5	no	woman	51
73	HPV16 positive	negative	+	+	+	+	-	-	T1	N3	M0	3	3/13	no	woman	60
74	negative	negative	-	-	-	+	-	-	T1	N0	M0	1	0/9	no	woman	57
75	negative	negative	+	+	+	+	-	-	T1	N0	M0	1	0/6	no	woman	62
76	HPV16 positive	negative	+	+	-	+	-	-	T2	N2	M0	3	4/23	yes	man	67
77	negative	negative	-	-	+	+	-	-	T1	N0	M0	1	0/14	no	woman	75
78	HPV18 positive	negative	-	+	+	+	-	-	?	N3	?	3	1/1	yes	man	69
79	HPV18 positive	negative	+	+	+	-	-	+	T2	N0	M0	2	0/10	no	woman	70
80	18/53/68	negative	-	+	+	+	-	-	T1	N3	M0	3	12/12	no	woman	49
81	negative	negative	+	-	-	+	-	-	T1	N0	M0	1	0/13	no	woman	53
82	negative	negative	-	-	+	+	-	-	T1	N0	M0	1	0/14	yes	man	63
83	negative	negative	+	+	+	+	-	-	T2	N0	M0	1	0	no	woman	65
84	negative	negative	+	-	-	+	-	-	T1	N0	M0	1	0/7	no	man	64
85	negative	negative	-	-	+	+	-	-	T1	N0	M0	1	0/4	no	man	67
86	negative	negative	+	-	+	+	-	-	T1	N0	M0	1	0/9	yes	man	61
87	negative	negative	+	-	+	+	-	-	T1	N0	M0	1	0/13	no	man	76
88	negative	negative	+	+	+	+	-	-	T1	N0	M0	1	0/4	no	woman	57
89	negative	HPV16 positive	+	+	+	-	+	+	T1	N0	M0	1	0/12	yes	man	60
90	negative	negative	-	+	+	+	-	-	T1	N0	M0	1	0/4	no	man	67
91	negative	negative	+	+	+	+	-	-	T1	N0	M0	1	0/9	no	woman	65
92	negative	negative	+	-	+	+	-	-	T1	N0	M0	1	0/15	yes	man	70
93	HPV18 positive	negative	-	-	+	+	-	-	T1	N0	M0	1	0/21	no	woman	65
94	HPV18 positive	negative	-	+	+	+	-	-	T1	N3	M0	3	24/28	yes	man	69
95	negative	negative	+	+	+	+	-	-	T1	N0	M0	1	0/6	no	woman	66
96	negative	negative	+	-	+	+	-	-	T1	N0	M0	1	0/20	no	woman	69
97	negative	negative	+	-	+	+	-	-	T1	N0	M0	1	0/17	yes	man	51
98	negative	negative	+	-	+	+	-	-	T1	N0	M0	1	0/6	yes	man	65
99	negative	negative	+	-	+	+	-	-	T1	N0	M0	1	0/5	no	woman	37
100	negative	negative	+	-	-	+	-	-	T1	N0	M0	1	0/18	yes	man	75
101	HPV16 positive	negative	+	+	-	+	-	-	T1	N3	M0	3	6/13	no	woman	58
102	negative	negative	-	-	-	+	-	-	T1	N0	M0	1	0/13	no	woman	59
